# Supplementary material
Source: Springer Nature journal article supplement (https://www.springermedizin.de/resource/supplementary/12935_2009_233_MOESM1_ESM.pdf/9540158)
Supplement: MOESM1 [file 9540158]

## Additional file 1 – One hundred genes examined in the present study

| No. | Symbol             | Gene name                                                          | Accession number |
|-----|--------------------|--------------------------------------------------------------------|------------------|
| 1   | <i>ABLIM1</i>      | actin binding LIM protein 1                                        | NM_001003407     |
| 2   | <i>ACTB</i>        | actin, beta                                                        | NM_001101        |
| 3   | <i>AMY2A</i>       | amylase, alpha 2A (pancreatic)                                     | NM_000699        |
| 4   | <i>ANGPTL4</i>     | angiopoietin-like 4                                                | NM_139314        |
| 5   | <i>ANXA8</i>       | annexin A8                                                         | NM_001040084     |
| 6   | <i>APLP1</i>       | amyloid beta (A4) precursor-like protein 1                         | NM_001024807     |
| 7   | <i>AREG</i>        | amphiregulin                                                       | NM_001657        |
| 8   | <i>ARF4L</i>       | ADP-ribosylation factor-like 4D                                    | NM_001661        |
| 9   | <i>ASCL1</i>       | achaete-scute complex homolog 1 (Drosophila)                       | NM_004316        |
| 10  | <i>ATM</i>         | ataxia telangiectasia mutated                                      | NM_000051        |
| 11  | <i>ATP11A</i>      | ATPase, class VI, type 11A                                         | NM_015205        |
| 12  | <i>ATP6V1F</i>     | ATPase, H <sup>+</sup> transporting, lysosomal 14kDa, V1 subunit F | NM_004231        |
| 13  | <i>BEX1</i>        | brain expressed, X-linked 1                                        | NM_018476        |
| 14  | <i>BICD2</i>       | bicaudal D homolog 2 (Drosophila)                                  | NM_001003800     |
| 15  | <i>BTBD3</i>       | BTB (POZ) domain containing 3                                      | NM_014962        |
| 16  | <i>BTF3</i>        | basic transcription factor 3                                       | NM_001037637     |
| 17  | <i>CANX</i>        | calnexin                                                           | NM_001746        |
| 18  | <i>CD24</i>        | CD24 molecule                                                      | NM_013230        |
| 19  | <i>CDC7</i>        | cell division cycle 7 homolog ( <i>S. cerevisiae</i> )             | NM_003503        |
| 20  | <i>CDH1</i>        | cadherin 1, type 1, E-cadherin (epithelial)                        | NM_004360        |
| 21  | <i>CFL1</i>        | cofilin 1 (non-muscle)                                             | NM_005507        |
| 22  | <i>CLDN4</i>       | claudin 4                                                          | NM_001305        |
| 23  | <i>COL7A1</i>      | collagen, type VII, alpha 1                                        | NM_000094        |
| 24  | <i>CSTA</i>        | cystatin A (stefin A)                                              | NM_005213        |
| 25  | <i>CTSL1(CTSL)</i> | cathepsin L1                                                       | NM_001912        |
| 26  | <i>CYB5A(CYB5)</i> | cytochrome b5 type A (microsomal)                                  | NM_148923        |
| 27  | <i>DCK</i>         | deoxycytidine kinase                                               | NM_000788        |
| 28  | <i>DDB1</i>        | damage-specific DNA binding protein 1, 127kDa                      | NM_001923        |
| 29  | <i>DST</i>         | dystonin                                                           | NM_183380        |
| 30  | <i>DUSP4</i>       | dual specificity phosphatase 4                                     | NM_001394        |
| 31  | <i>ECM1</i>        | extracellular matrix protein 1                                     | NM_004425        |
| 32  | <i>EEF1B2</i>      | eukaryotic translation elongation factor 1 beta 2                  | NM_001959        |
| 33  | <i>EEF2</i>        | eukaryotic translation elongation factor 2                         | NM_001961        |
| 34  | <i>EFNA1</i>       | ephrin-A1                                                          | NM_004428        |
| 35  | <i>ELF3</i>        | E74-like factor 3                                                  | NM_004433        |
| 36  | <i>FABP1</i>       | fatty acid binding protein 1, liver                                | NM_001443        |
| 37  | <i>FOSL1</i>       | FOS-like antigen 1                                                 | NM_005438        |
| 38  | <i>FOXP1</i>       | forkhead box G1                                                    | NM_005249        |
| 39  | <i>GAPDH(GAPD)</i> | glyceraldehyde-3-phosphate dehydrogenase                           | NM_002046        |
| 40  | <i>GNB1</i>        | guanine nucleotide binding protein (G protein), beta polypeptide 1 | NM_002074        |
| 41  | <i>GPR116</i>      | G protein-coupled receptor 116                                     | NM_015234        |
| 42  | <i>HBEGF</i>       | heparin-binding EGF-like growth factor                             | NM_001945        |
| 43  | <i>HMGA1</i>       | high mobility group AT-hook 1                                      | NM_145899        |
| 44  | <i>HPN</i>         | hepsin (transmembrane protease, serine 1)                          | NM_002151        |
| 45  | <i>IFNGR2</i>      | interferon gamma receptor 2 (interferon gamma transducer 1)        | NM_005534        |
| 46  | <i>IGSF3</i>       | immunoglobulin superfamily, member 3                               | NM_001542        |
| 47  | <i>INA</i>         | internexin neuronal intermediate filament protein, alpha           | NM_032727        |
| 48  | <i>INADL</i>       | InaD-like (Drosophila)                                             | NM_176877        |
| 49  | <i>INSM1</i>       | insulinoma-associated 1                                            | NM_002196        |
| 50  | <i>ISL1</i>        | ISL LIM homeobox 1                                                 | NM_002202        |
| 51  | <i>JUP</i>         | junction plakoglobin                                               | NM_021991        |
| 52  | <i>KIF5C</i>       | kinesin family member 5C                                           | NM_004522        |
| 53  | <i>KRT5</i>        | keratin 5                                                          | NM_000424        |
| 54  | <i>KRT13</i>       | keratin 13                                                         | NM_002274        |

|     |                     |                                                                                             |              |
|-----|---------------------|---------------------------------------------------------------------------------------------|--------------|
| 55  | <i>KRT15</i>        | keratin 15                                                                                  | NM_002275    |
| 56  | <i>KRT17</i>        | keratin 17                                                                                  | NM_000422    |
| 57  | <i>KRTCAP3</i>      | keratinocyte associated protein 3                                                           | NM_173853    |
| 58  | <i>LDHA</i>         | lactate dehydrogenase A                                                                     | NM_005566    |
| 59  | <i>LGALS7</i>       | lectin, galactoside-binding, soluble, 7                                                     | NM_002307    |
| 60  | <i>MAL2</i>         | mal, T-cell differentiation protein 2                                                       | NM_052886    |
| 61  | <i>MALL(BENE)</i>   | mal, T-cell differentiation protein-like                                                    | NM_005434    |
| 62  | <i>MCM3</i>         | minichromosome maintenance complex component 3                                              | NM_002388    |
| 63  | <i>MGAT1</i>        | mannosyl (alpha-1,3-)-glycoprotein beta-1,2-N-acetylglucosaminyltransferase                 | NM_002406    |
| 64  | <i>MYCL1</i>        | v-myc myelocytomatosis viral oncogene homolog 1, lung carcinoma derived (avian)             | NM_001033081 |
| 65  | <i>OCLN</i>         | occludin                                                                                    | NM_002538    |
| 66  | <i>ODC1</i>         | ornithine decarboxylase 1                                                                   | NM_002539    |
| 67  | <i>PDRG1</i>        | p53 and DNA damage regulated 1                                                              | NM_030815    |
| 68  | <i>PFDN5</i>        | prefoldin subunit 5                                                                         | NM_002624    |
| 69  | <i>PHLDA1</i>       | pleckstrin homology-like domain, family A, member 1                                         | NM_007350    |
| 70  | <i>PLAT</i>         | plasminogen activator, tissue                                                               | NM_000930    |
| 71  | <i>PLAU</i>         | plasminogen activator, urokinase                                                            | NM_002658    |
| 72  | <i>PLTP</i>         | phospholipid transfer protein                                                               | NM_006227    |
| 73  | <i>PTMA</i>         | prothymosin, alpha                                                                          | NM_001099285 |
| 74  | <i>PTPRN2</i>       | protein tyrosine phosphatase, receptor type, N polypeptide 2                                | NM_002847    |
| 75  | <i>QPCT</i>         | glutaminy-peptide cyclotransferase                                                          | NM_012413    |
| 76  | <i>RAB25</i>        | RAB25, member RAS oncogene family                                                           | NM_020387    |
| 77  | <i>RAB38</i>        | RAB38, member RAS oncogene family                                                           | NM_022337    |
| 78  | <i>S100A2</i>       | S100 calcium binding protein A2                                                             | NM_005978    |
| 79  | <i>S100P</i>        | S100 calcium binding protein P                                                              | NM_005980    |
| 80  | <i>SELENBP1</i>     | selenium binding protein 1                                                                  | NM_003944    |
| 81  | <i>SFTPA1</i>       | surfactant, pulmonary-associated protein A1                                                 | NM_001093770 |
| 82  | <i>SFTPB</i>        | surfactant, pulmonary-associated protein B                                                  | NM_000542    |
| 83  | <i>SFTPD</i>        | surfactant, pulmonary-associated protein D                                                  | NM_003019    |
| 84  | <i>SLC16A4</i>      | solute carrier family 16, member 4 (monocarboxylic acid transporter 5)                      | NM_004696    |
| 85  | <i>SLC25A6</i>      | solute carrier family 25 (mitochondrial carrier; adenine nucleotide translocator), member 6 | NM_001636    |
| 86  | <i>SLCO4A1</i>      | solute carrier organic anion transporter family, member 4A1                                 | NM_016354    |
| 87  | <i>SNAI2</i>        | snail homolog 2 (Drosophila)                                                                | NM_003068    |
| 88  | <i>SPINT2</i>       | serine peptidase inhibitor, Kunitz type, 2                                                  | NM_021102    |
| 89  | <i>SSR2</i>         | signal sequence receptor, beta (translocon-associated protein beta)                         | NM_003145    |
| 90  | <i>STMN1</i>        | stathmin 1/oncoprotein 18                                                                   | NM_203399    |
| 91  | <i>TACSTD1</i>      | tumor-associated calcium signal transducer 1                                                | NM_002354    |
| 92  | <i>TBL1XR1</i>      | transducin (beta)-like 1 X-linked receptor 1                                                | NM_024665    |
| 93  | <i>TERT</i>         | telomerase reverse transcriptase                                                            | NM_198253    |
| 94  | <i>TFRC</i>         | transferrin receptor (p90, CD71)                                                            | NM_003234    |
| 95  | <i>TGM2</i>         | transglutaminase 2 (C polypeptide, protein-glutamine-gamma-glutamyltransferase)             | NM_004613    |
| 96  | <i>TMED9</i>        | transmembrane emp24 protein transport domain containing 9                                   | NM_017510    |
| 97  | <i>TMSL8(TMSNB)</i> | thymosin-like 8                                                                             | NM_021992    |
| 98  | <i>TP63(TP73L)</i>  | tumor protein p63                                                                           | NM_003722    |
| 99  | <i>UNG</i>          | uracil-DNA glycosylase                                                                      | NM_003362    |
| 100 | <i>VEGFC</i>        | vascular endothelial growth factor C                                                        | NM_005429    |
